# Supplementary material for: SepN is essential for assembly and gating of septal junctions in Nostoc sp. PCC 7120
Source: bioRxiv or medRxiv preprint supplement (doi:10.1101/2022.01.26.477872), 2022-01-26
Supplement: Supplementary file [file media-1.pdf]

## SepN is essential for assembly and gating of septal junctions in *Nostoc* sp. PCC 7120

Ann-Katrin Kieninger, Piotr Tokarz, Gregor L. Weiss, Martin Pilhofer and Iris Maldener

### Supplemental data:

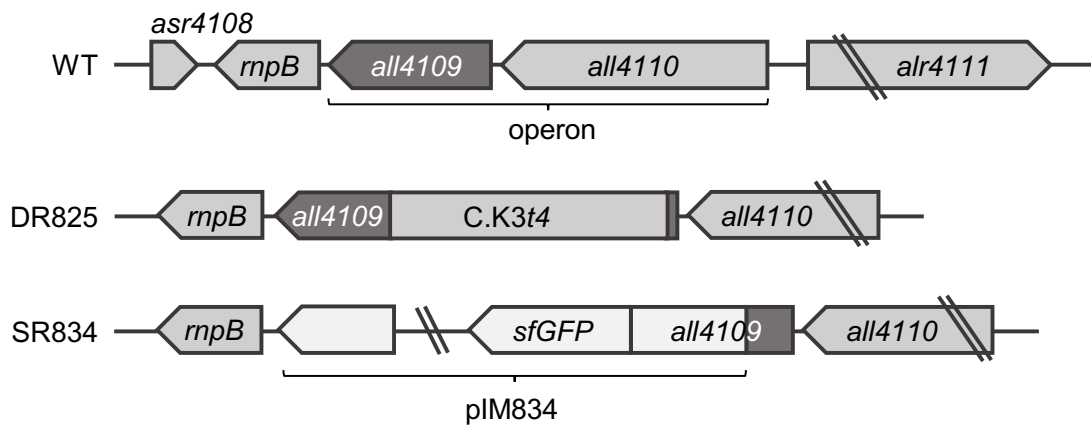

### Supplement Figure 1: Schematic representation of the *all4109* genomic region.

For inactivation of *all4109* the neomycin resistance cassette C.K3t4 was inserted into the ORF of *all4109* via double homologous recombination creating strain DR825. Genomic *all4109* was exchanged for an *all4109-sfgfp* translation fusion via single homologous recombination with plasmid pIM834 yielding strain SR834.

**Supplement Table 1: Strains and plasmids used in this work.**

| <b>Nostoc sp. strains</b>       | Relevant characteristics                                                                                                                                                                                                                              | Reference                          |
|---------------------------------|-------------------------------------------------------------------------------------------------------------------------------------------------------------------------------------------------------------------------------------------------------|------------------------------------|
| PCC 7120                        | wild type                                                                                                                                                                                                                                             | Rippka <i>et al.</i> , 1979        |
| CSVT2                           | $\Delta fraD$ ( $\Delta alr2393$ )                                                                                                                                                                                                                    | Merino-Puerto <i>et al.</i> , 2010 |
| 7120.800                        | $P_{fraCDE-gfpmut2}$ , Sm <sup>r</sup> , Sp <sup>r</sup>                                                                                                                                                                                              | This study                         |
| DR825                           | <i>all4109::C.K3t4</i> cassette, Nm <sup>r</sup>                                                                                                                                                                                                      | This study                         |
| SR834                           | <i>all4109-5xGS-sfgfp</i> , Sm <sup>r</sup> , Sp <sup>r</sup>                                                                                                                                                                                         | This study                         |
| DR825.848                       | <i>all4109::C.K3t4</i> , $P_{all4110/4109-all4109}$ , Nm <sup>r</sup> , Sm <sup>r</sup> , Sp <sup>r</sup>                                                                                                                                             | This study                         |
| CSVT2.SR834                     | $\Delta fraD$ ( <i>alr2393</i> ), <i>all4109-5xGS-sfgfp</i> , Sm <sup>r</sup> , Sp <sup>r</sup>                                                                                                                                                       | This study                         |
| <b>Escherichia coli strains</b> |                                                                                                                                                                                                                                                       |                                    |
| NEB 10 $\beta$                  | $\Delta(ara-leu)$ 7697 <i>araD139 fhuA</i> $\Delta lacX74 galK16 galE15 e14-$ $\Phi 80dlacZ\Delta M15 recA1 relA1 endA1 nupG rpsL$ (Str <sup>R</sup> ) <i>rph spoT1</i> $\Delta(mrr-hsdRMS-mcrBC)$                                                    | NEB <i>biolabs</i>                 |
| HB101                           | F <sup>-</sup> , <i>thi-1</i> , <i>hsdS20</i> ( $r_B^-$ , $m_B^-$ ), <i>supE44</i> , <i>recA13</i> ,<br><i>ara-14</i> , <i>leuB6</i> , <i>proA2</i> , <i>lacY1</i> , <i>galk2</i> , <i>rpsL20</i> (str <sup>r</sup> ),<br><i>xyl-5</i> , <i>mtl-1</i> | Sambrook <i>et al.</i> , 1989      |
| J53 (RP-4)                      | R <sup>+</sup> , <i>met</i> , <i>pro</i> (RP-4: <i>Ap</i> , <i>Tc</i> , <i>Km</i> , <i>Tra</i> <sup>+</sup> , <i>IncP</i> )                                                                                                                           | Wolk <i>et al.</i> , 1984          |
| <b>Plasmids</b>                 |                                                                                                                                                                                                                                                       |                                    |
| pIM800                          | $P_{fraCDE-gfpmut2}$ in pRL1049, Sm <sup>r</sup> , Sp <sup>r</sup>                                                                                                                                                                                    | This study                         |
| pIM825                          | <i>C.K3t4</i> cassette flanked by upstream and C-terminal fragment of <i>all4109</i> in pRL277, Sm <sup>r</sup> , Sp <sup>r</sup> , Km <sup>r</sup>                                                                                                   | This study                         |
| pIM834                          | C-terminal <i>all4109</i> -fragment fused to 5xGS-linker and <i>sfgfp</i> in pRL277, Sm <sup>r</sup> , Sp <sup>r</sup>                                                                                                                                | This study                         |
| pIM848                          | $P_{all4110/4109-all4109}$ in pRL1049, Sm <sup>r</sup> , Sp <sup>r</sup>                                                                                                                                                                              | This study                         |
| pIM779                          | $P_{fraCDE-gfpmut2-fraD}$ in pRL1049, Sm <sup>r</sup> , Sp <sup>r</sup>                                                                                                                                                                               | Weiss <i>et al.</i> , 2019         |
| pIM660.2                        | C-terminal <i>alr3353</i> -fragment fused to 5xGS-linker and <i>sfgfp</i> in pRL277, Sm <sup>r</sup> , Sp <sup>r</sup>                                                                                                                                | Bornikoel, unpublished             |
| pRL1049                         | Self-replicating plasmid for <i>Anabaena</i> sp., Sm <sup>r</sup> , Sp <sup>r</sup>                                                                                                                                                                   | Black and Wolk, 1994               |
| pRL277                          | Non-replicating, mobilizable vector containing <i>sacB</i> , Sm <sup>r</sup> , Sp <sup>r</sup>                                                                                                                                                        | Black <i>et al.</i> , 1993         |
| pRL528                          | Helper plasmid for mobilization used in triparental mating, Cm <sup>r</sup>                                                                                                                                                                           | Wolk <i>et al.</i> , 1984          |

Sm: Streptomycin, Sp: Spectinomycin, Km: Kanamycin, Nm: Neomycin, Cm: Chloramphenicol

**Supplement Table 2:** Oligonucleotides used in this work.

---

| Oligo # | Sequence (5' → 3')                                                      |
|---------|-------------------------------------------------------------------------|
| 1383    | TCTAGAGGATCTCAATGAATA                                                   |
| 1384    | ATGCTTGTAACCGTTTTG                                                      |
| 1444    | TAGTGGATCCGGTAGTGGATCCGGTAGCGCATCAAAGGTGAAGAATTATTTAC                   |
| 1445    | GCCAGTTAATAGTTTGCGCAACGTTGTTGCCATTGCTGCATTATTTATATAATTCAT<br>CCATACCATG |
| 1998    | GATATCCCGCAAGAGGCCCTTTCGTCTTCAAGAATTCTGCCGTTCCCTTGTCATCTG               |
| 2235    | CCACAACGGTTTCCCTCTACCGGGATCCGGTATTTGTATAGTTCATCCATGCCAT<br>GTG          |
| 2397    | ATTCATTGAGATCCTCTAGATGGTCAGTACTCCTAGTC                                  |
| 2398    | CAAACGGTTTACAAGCATATTGGACTTATGCCCTACC                                   |
| 2399    | ATGGCAGAAATTCGATATCTAGATCTCGAGTGCTCGATGCGATTATTG                        |
| 2400    | TAATAGTTTGCGCAACGTTGTTGCCATTGCTGCAGGTTGTCAGTTGCCAGTTG                   |
| 2446    | GCTTTGCAGGCGTGAG                                                        |
| 2447    | TCGCACTGGACGTTATC                                                       |
| 2450    | ATGGCAGAAATTCGATATCTAGATCTCGATTGGTGTATCTTATATATT                        |
| 2451    | ACCGGATCCACTACCGGATCCACTACCCTTTTTATTCCAGGGTAGG                          |
| 2511    | AGAGGCCCTTTCGTCTTCAAGAATTTTGCCGTCAGGCTTAG                               |
| 2512    | TGGTCAGTACTCCTAGTCATGCAGTTATACCCGAAACTT                                 |
| 2513    | ATGACTAGGAGTACTGACC                                                     |
| 2514    | GACCACAACGGTTTCCCTCTACCGGTTATTTCTTTTTATTCCAGGGTAG                       |

---

**Supplement Table 3:** Performed co-IPs with respective controls.

| Antibody | Co-IP | Sample    | Control        |                  |
|----------|-------|-----------|----------------|------------------|
| α-GFP    | 1     | CSVT2.779 | CSVT2.779      | - glutaraldehyde |
|          |       | CSVT2.779 | empty beads    |                  |
|          | 2     | CSVT2.779 | 7120.800       | - glutaraldehyde |
|          |       | CSVT2.779 |                |                  |
|          | 3     | CSVT2.779 | CSVT2.779      | - glutaraldehyde |
|          |       | CSVT2.779 | empty beads    |                  |
| α-FraD   | 1     | WT        | WT             | - glutaraldehyde |
|          | 2     |           | pre-immunserum |                  |
|          | 3     |           | CSVT2          |                  |

CSVT2.779:  $\Delta fraD$  + p(*gfpmut2-fraD*); 7120.800: WT + p(*gfpmut2*); CSVT2:  $\Delta fraD$ .

References:

Black TA, Cai Y, Wolk CP 1993. Spatial expression and autoregulation of *hetR*, a gene involved in the control of heterocyst development in *Anabaena*. *Mol. Microbiol.* 9, 77–84.

Black TA, Wolk CP 1994. Analysis of a Het- mutation in *Anabaena* sp. strain PCC 7120 implicates a secondary metabolite in the regulation of heterocyst spacing. *J. Bacteriol.* 176, 2282–2292.

Merino-Puerto V, Mariscal V, Mullineaux CW, Herrero A, Flores E. 2010. Fra proteins influencing filament integrity, diazotrophy and localization of septal protein SepJ in the heterocyst-forming cyanobacterium *Anabaena* sp. *Molecular microbiology* 75: 1159-70

Rippka R, Deruelles J, Waterbury JB, Herdman M, Stanier RY. 1979. Generic Assignments, Strain Histories and Properties of Pure Cultures of Cyanobacteria. *Microbiology (Reading, England)* 111: 1-61

Sambrook J, Fritsch EF, Maniatis T. 1989. *Molecular cloning: a laboratory manual*. Cold Spring Harbor, NY: Cold Spring Harbor Laboratory Press. xxxviii + 1546 pp. pp.

Weiss GL, Kieninger A-K, Maldener I, Forchhammer K, Pilhofer M, (2019). Structure and Function of a Bacterial Gap Junction Analog. *Cell* 178:2, 374-84.e15.

Wolk CP, Vonshak A, Kehoe P, Elhai J. 1984. Construction of shuttle vectors capable of conjugative transfer from *Escherichia coli* to nitrogen-fixing filamentous cyanobacteria. *Proceedings of the National Academy of Sciences* 81: 1561-65
